# Supplementary material for: The Age-Accompanied and Diet-Associated Remodeling of the Phospholipid, Amino Acid, and SCFA Metabolism of Healthy Centenarians from a Chinese Longevous Region: A Window into Exceptional Longevity
Source: MDPI journal article supplement (doi:10.3390/nu14204420), 2022-10-21
Supplement: s1 [file s1]

Table S1 Repeatability of ion intensity in QC samples

| Molecular weight | Retention time | m/z    | Ion intensity | CV    |
|------------------|----------------|--------|---------------|-------|
| Positive mode    |                |        |               |       |
| 117.05           | 0.86           | 118.06 | 160.42        | 2.55% |
| 131.07           | 0.87           | 132.08 | 862.65        | 1.81% |
| 103.06           | 0.89           | 104.07 | 864.93        | 3.01% |
| 60.03            | 0.94           | 61.04  | 24523.75      | 5.64% |
| 113.06           | 0.95           | 114.07 | 14164.04      | 3.60% |
| 137.05           | 0.97           | 138.05 | 778.79        | 1.96% |
| 129.04           | 1.22           | 130.05 | 443.87        | 3.12% |
| 131.06           | 1.23           | 132.07 | 45.79         | 5.64% |
| 182.04           | 1.47           | 183.05 | 170.50        | 5.02% |
| 220.08           | 1.55           | 221.09 | 376.08        | 3.66% |
| 180.04           | 1.86           | 181.05 | 151.31        | 4.54% |
| 179.08           | 2.41           | 180.09 | 395.78        | 4.75% |
| 204.09           | 3.35           | 188.07 | 1737.25       | 2.32% |
| 180.05           | 3.48           | 181.06 | 490.16        | 4.90% |
| 146.07           | 3.70           | 130.05 | 3975.81       | 1.85% |
| 394.25           | 3.86           | 395.25 | 8.31          | 4.89% |
| 594.34           | 4.12           | 595.35 | 122.31        | 3.43% |
| 465.31           | 4.36           | 466.31 | 119.71        | 4.51% |
| 267.09           | 4.53           | 268.10 | 44.02         | 3.26% |
| 317.29           | 5.51           | 318.30 | 1484.55       | 2.11% |
| Negative mode    |                |        |               |       |
| 155.07           | 0.77           | 154.06 | 186.77        | 3.19% |
| 136.04           | 0.87           | 135.03 | 1338.40       | 2.45% |
| 166.05           | 0.87           | 165.04 | 397.19        | 5.11% |
| 194.04           | 0.87           | 193.04 | 121.45        | 2.90% |
| 133.04           | 0.89           | 132.03 | 55.85         | 2.51% |
| 180.06           | 0.89           | 179.06 | 312.16        | 3.40% |
| 156.02           | 0.90           | 155.01 | 14.36         | 6.53% |
| 150.05           | 0.97           | 149.05 | 416.18        | 3.02% |
| 89.05            | 1.20           | 245.08 | 26.42         | 6.16% |
| 123.03           | 1.24           | 122.03 | 11.65         | 5.78% |
| 160.07           | 2.18           | 159.07 | 142.11        | 4.16% |
| 158.06           | 3.45           | 157.05 | 196.99        | 1.74% |
| 181.07           | 3.46           | 180.07 | 16.24         | 4.13% |
| 132.08           | 3.88           | 172.10 | 78.73         | 5.62% |
| 173.11           | 3.88           | 172.10 | 52.34         | 4.67% |
| 594.34           | 4.11           | 593.34 | 5.87          | 6.30% |
| 465.31           | 4.33           | 464.30 | 389.92        | 1.73% |
| 481.24           | 4.35           | 480.23 | 74.74         | 3.66% |
| 267.09           | 4.52           | 266.09 | 48.23         | 3.00% |
| 408.29           | 4.74           | 453.29 | 259.63        | 2.22% |

CV, coefficient of variance.
